# Supplementary material
Source: MDPI journal article supplement (https://www.mdpi.com/2311-7524/8/5/443)
Supplement: s1 [file s1]

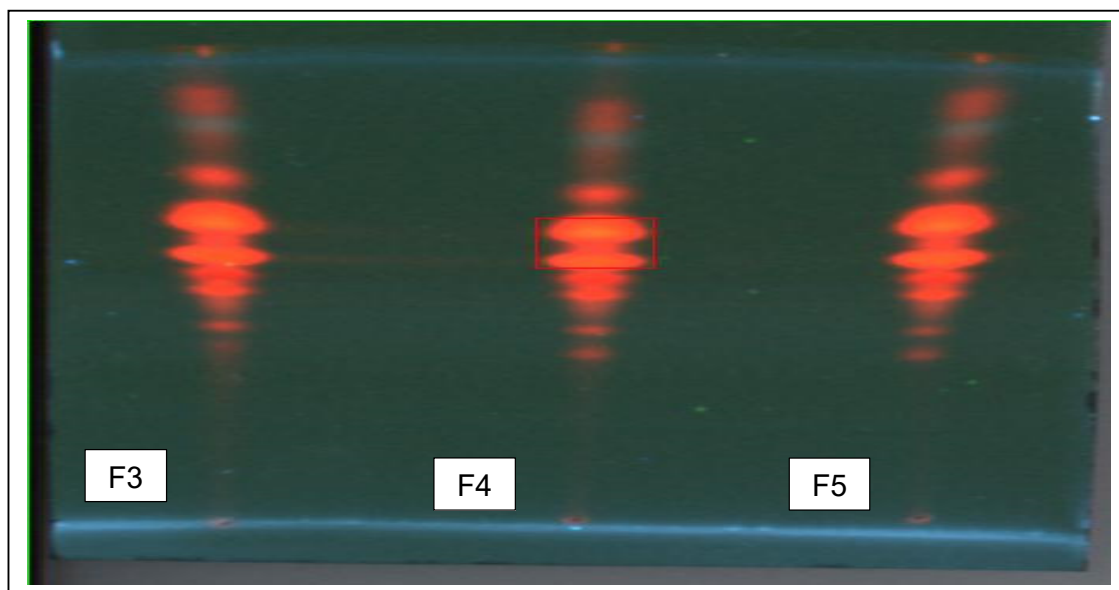

Figure S1. Thin-layer chromatography (TLC) profiles of the hexane fractions of the leaves of *Ocimum basilicum*. The TLC plate was developed using the mobile phase hexane-acetone (8:2, v/v).
